# Supplementary material
Source: HighWire-hosted journal article supplement (https://informatics.bmj.com/content/31/1/e100780)
Supplement: inline-supplementary-material-1 [file inline-supplementary-material-1.pdf]

### **Search Query for Databases**

(ophthalmolog\* OR ophthalmolog\* OR ophthamolog\* OR ophthamolog\* OR ocular OR intra-ocular OR intraocular OR retina\* OR macula\* OR fovea OR uvea OR sclera OR cornea\* OR conjunctiv\* OR (eye\* AND iris\*) OR (pupil AND dilat\*) OR "vitreous body" OR "vitreous humor" OR "aqueous humor" OR vitreal OR "aqueous humor" OR "optical coherence tomography" OR OCT OR "color fundus photograph\*" OR "slit lamp\*" OR "confocal microscope\*" OR "confocal scanning microscope\*" OR "ultrasound biomicroscope\*" OR "ultrasound bio-microscope\*" OR "fundus fluorescein angiograph\*" OR "indocyanine green angiograph\*" OR "scanning laser ophthalmoscope\*" OR "ocular ultrasonograph\*" OR "microperimetry" OR "multifocal visual-evoked potential\*" OR "macular degeneration" OR (eye AND cataract\*) OR glaucoma OR uveitis OR iritis OR choroiditis OR chorioretinitis OR endophthalmitis OR "optic neuropathy" OR "optic atrophy" OR "diabetic macular edema" OR vitrectomy OR phacoemulsification OR paracentesis OR trabeculectomy OR canaloplasty OR iridectomy OR goniotomy OR phacoemulsification OR extracapsular OR (photocoagulation AND eye\*) OR "selective laser trabeculoplasty" OR "pneumatic retinopexy" OR "scleral buckle" OR canthotomy OR catholysis OR "closure of cyclodialysis cleft" OR "decompression of dacryocoele" OR "decompression of orbit" OR "pars plana lensectomy" OR "retrobulbar injection\*" OR "strabismus surgery" OR synechiolysis OR tarsorrhaphy OR "iridology" OR "visual field\*" OR "fundus oculi" OR myopi\* OR "visual disorder\*" OR "vision disorder\*" OR "confocal laser scanning microscope\*")

AND

("artificial\* intelligen\*" OR AI OR "deep learning" OR "convolutional neural network\*" OR MTANN OR "artificial neural network\*" OR "machine learning" OR "long short term memory" OR "supervised clustering" OR "supervised learning" OR "unsupervised learning" OR "semi-supervised learning" OR "semi supervised learning" OR backpropagation OR "back-propagation" OR "feed forward" OR "feed-forward" OR "feature learning" OR "decision tree\*" OR "transfer learning" OR "big data" OR "natural language processing" OR "computer vision" OR "image recognition" OR "semantic analysis\*" OR "cognitive computing" OR "entity annotation\*" OR "entity extraction\*" OR "machine intelligence" OR "predictive analysis\*" OR "k-nearest neighbour" OR "k nearest neighbour" OR "lattice neural network\*" OR "random forest\*" OR "random-forest\*" OR "feature extraction" OR "optic cup segmentation" OR "data mining" OR "computer-aided detection" OR "computer aided detection" OR "deep belief fusion" OR "deep-belief fusion" OR "feature fusion")
